# Supplementary material
Source: Springer Nature journal article supplement (https://www.springermedizin.de/resource/supplementary/12958_2010_839_MOESM4_ESM.pdf/9568978)
Supplement: MOESM4 [file 9568978]

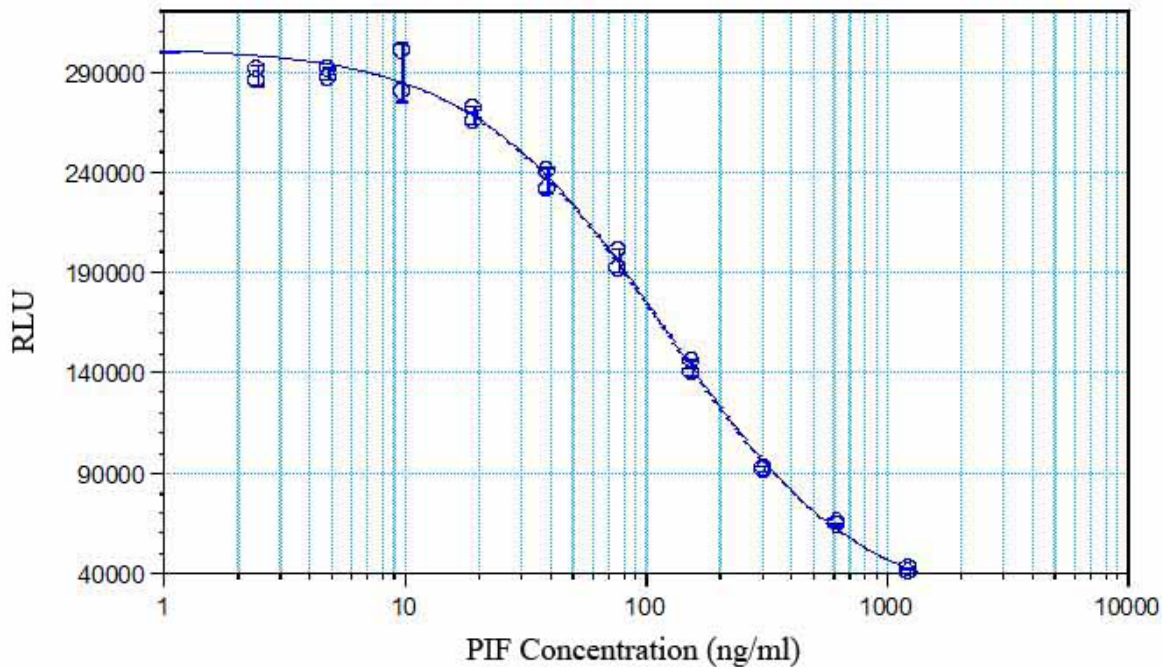

4-P Fit:  $y = (A - D) / (1 + (x/C)^B) + D$

○ STD (Group01: Concentration vs Values)

| A        | B    | C   | D        | R <sup>2</sup> |
|----------|------|-----|----------|----------------|
| 3.02e+05 | 1.08 | 121 | 2.08e+04 | 0.995          |

Curve Fit Option - Fixed Weight Value
